# Supplementary material for: Mechanisms of Pyrethroid Resistance in the Dengue Mosquito Vector, Aedes aegypti: Target Site Insensitivity, Penetration, and Metabolism
Source: PubMed Central journal article supplement (PMC4063723; doi:10.1371/journal.pntd.0002948), 2014-06-19
Supplement: pntd.0002948.s001.pdf [file pntd.0002948.s001.pdf]

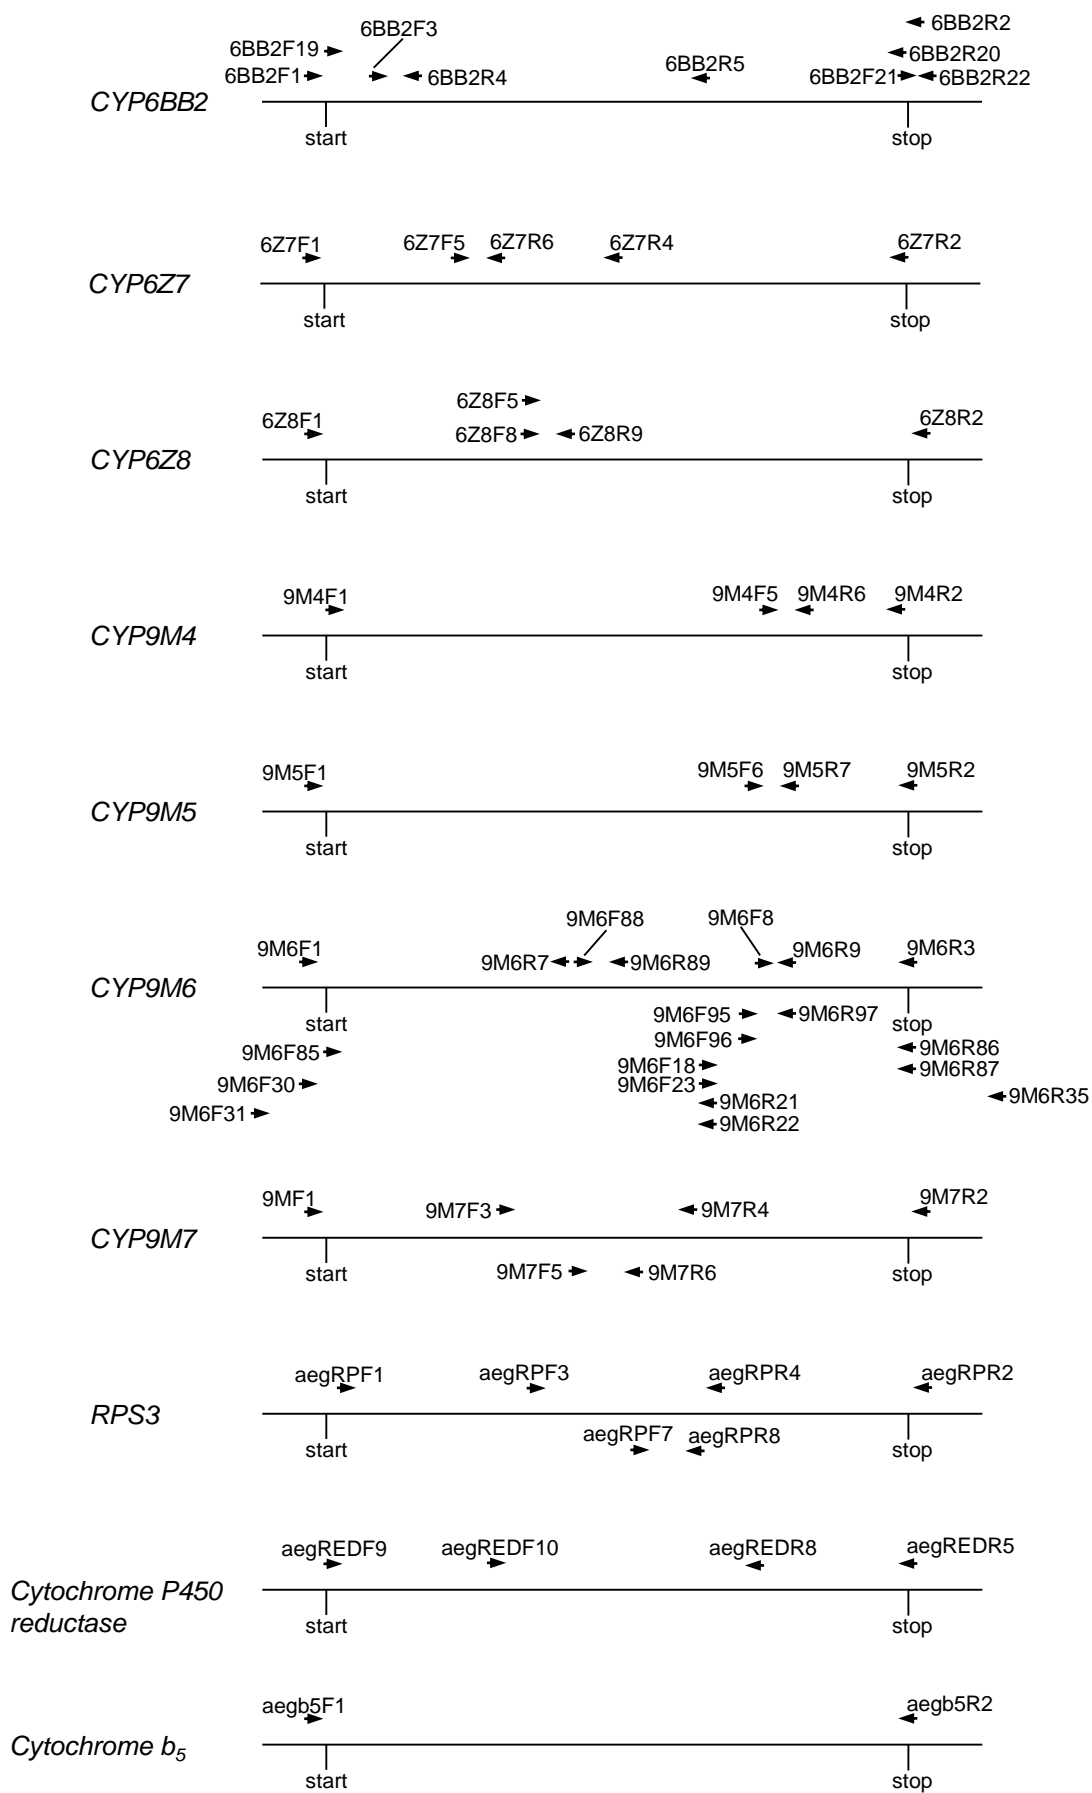

**Figure S1** Diagram depicting primer positions
