# Supplementary material for: Mechanisms of Pyrethroid Resistance in the Dengue Mosquito Vector, Aedes aegypti: Target Site Insensitivity, Penetration, and Metabolism
Source: PubMed Central journal article supplement (PMC4063723; doi:10.1371/journal.pntd.0002948), 2014-06-19
Supplement: pntd.0002948.s002.pdf [file pntd.0002948.s002.pdf]

|                    |                                                                  |     |
|--------------------|------------------------------------------------------------------|-----|
| <i>9M6v1</i> (SP)  | 1: ATGGTTTTGTTGGACTTGCTTGTTGTTCTGATTCCGATCGTTTCGTATCTGCTCTACCGA  | 60  |
| <i>9M6v2</i> (SP)  | 1: -----                                                         | 60  |
| <i>9M6v3</i> (SMK) | 1: -----T                                                        | 60  |
| <i>9M6v4</i> (SMK) | 1: -----T                                                        | 60  |
| <i>9M6v5</i> (SMK) | 1: -----T                                                        | 60  |
|                    |                                                                  |     |
| <i>9M6v1</i> (SP)  | 61: TGGGCAGTGGCCACCTACGATTTTTTTGAAAAGCGAAAATTCCTATGTGAAACCCTAC   | 120 |
| <i>9M6v2</i> (SP)  | 61: -----A-----                                                  | 120 |
| <i>9M6v3</i> (SMK) | 61: -----                                                        | 120 |
| <i>9M6v4</i> (SMK) | 61: -----                                                        | 120 |
| <i>9M6v5</i> (SMK) | 61: -----                                                        | 120 |
|                    |                                                                  |     |
| <i>9M6v1</i> (SP)  | 121: CCGTTTGTTGGGGGATTGTGGCCGGTGTCTCCGGGAAGCTCCATCCAACCGATGCCGCC | 180 |
| <i>9M6v2</i> (SP)  | 121: -----                                                       | 180 |
| <i>9M6v3</i> (SMK) | 121: -----                                                       | 180 |
| <i>9M6v4</i> (SMK) | 121: -----                                                       | 180 |
| <i>9M6v5</i> (SMK) | 121: -----                                                       | 180 |
|                    |                                                                  |     |
| <i>9M6v1</i> (SP)  | 181: GTTTTGGGGTACAACCTGTTCCCGGAGAATCGCTTCTCGGGATTTTCGCATTCCGTCCG | 240 |
| <i>9M6v2</i> (SP)  | 181: -----G-----                                                 | 240 |
| <i>9M6v3</i> (SMK) | 181: -----G-----                                                 | 240 |
| <i>9M6v4</i> (SMK) | 181: -----G-----                                                 | 240 |
| <i>9M6v5</i> (SMK) | 181: -----G-----                                                 | 240 |

|                    |                                                                    |     |
|--------------------|--------------------------------------------------------------------|-----|
| <i>9M6v1</i> (SP)  | 241 : CCGGGATATCTTATCCAGGATCCAGCGCTGGCGAAACAGATTATGATCAAGGATTTGAT  | 300 |
| <i>9M6v2</i> (SP)  | 241 : -----                                                        | 300 |
| <i>9M6v3</i> (SMK) | 241 : -----A-----                                                  | 300 |
| <i>9M6v4</i> (SMK) | 241 : -----                                                        | 300 |
| <i>9M6v5</i> (SMK) | 241 : -----                                                        | 300 |
| <i>9M6v1</i> (SP)  | 301 : CATTTCACCGACCATATGAATACGATTTGGTGGATGTGGACCCATTTTCGGGCGGGCA   | 360 |
| <i>9M6v2</i> (SP)  | 301 : --C---T--T-----T-----T-----                                  | 360 |
| <i>9M6v3</i> (SMK) | 301 : -----T--T-----T-----T-----                                   | 360 |
| <i>9M6v4</i> (SMK) | 301 : --C---T--T-----T-----T-----                                  | 360 |
| <i>9M6v5</i> (SMK) | 301 : -----T--T-----T-----T-----                                   | 360 |
| <i>9M6v1</i> (SP)  | 361 : CTGTTCTTCATGGATGGACAAAGATGGCGACATGGACGGTCAGGGCTAAGTCCGGCATT  | 420 |
| <i>9M6v2</i> (SP)  | 361 : -----T-----C-----T-----T-----                                | 420 |
| <i>9M6v3</i> (SMK) | 361 : -----T-----C-----T-----A--T-----                             | 420 |
| <i>9M6v4</i> (SMK) | 361 : -----T-----C-----T-----T-----                                | 420 |
| <i>9M6v5</i> (SMK) | 361 : -----A--T-----A-----                                         | 420 |
| <i>9M6v1</i> (SP)  | 421 : ACGGGAAGCAAGATGAGGAACATGTTCACTTTGCTATCCAAGTATGTCGAAGGGGCCATG | 480 |
| <i>9M6v2</i> (SP)  | 421 : -----T-----                                                  | 480 |
| <i>9M6v3</i> (SMK) | 421 : -----                                                        | 480 |
| <i>9M6v4</i> (SMK) | 421 : -----T-----                                                  | 480 |
| <i>9M6v5</i> (SMK) | 421 : -----T-----                                                  | 480 |

9M6v1 (SP) 481 : CAGCGGTTGGCTCAAGATGCCGGACAAAGGAAGATGGAGCTGGAGGTACGTGATCTGTTT 540

9M6v2 (SP) 481 : ----- G ----- A ----- 540

9M6v3 (SMK) 481 : ----- G ----- A ----- 540

9M6v4 (SMK) 481 : ----- G ----- A ----- 540

9M6v5 (SMK) 481 : ----- G ----- A ----- 540

9M6v1 (SP) 541 : CAAAAGCTTGGCAATGACATCATCACGT  CGATTTTCGTTTGGCGTAGAAATCGATT  TCGGTG 600

9M6v2 (SP) 541 : ----- 600

9M6v3 (SMK) 541 : ----- 600

9M6v4 (SMK) 541 : ----- 600

9M6v5 (SMK) 541 : ----- 600

9M6v1 (SP) 601 :  CACAATCCAAACAACGAGTTTTTCAAAGGGGAAAGCAGTTGGCAGCCACTGGTGGTTTT 660

9M6v2 (SP) 601 : ----- 660

9M6v3 (SMK) 601 : ----- 660

9M6v4 (SMK) 601 : ----- A ----- 660

9M6v5 (SMK) 601 : ----- 660

9M6v1 (SP) 661 : CAGGGACTTAAATTTTTCT 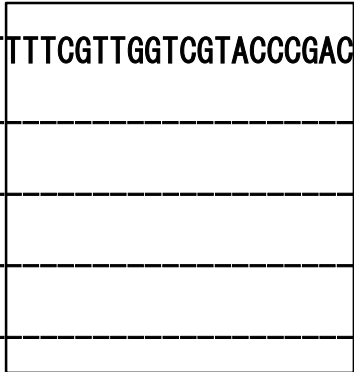 TTCGTTGGTCGTACCCGACAGCGTTTTCAAAC TATTCGGG 720

9M6v2 (SP) 661 : ----- 720

9M6v3 (SMK) 661 : ----- G ----- 720

9M6v4 (SMK) 661 : ----- 720

9M6v5 (SMK) 661 : ----- G ----- 720

9M6v1 (SP) 721: ATTCGATTCTACCCAAAGAAGCGGCTGATTTTTATGTTGATGTCGTATCGAAAACATC 780

9M6v2 (SP) 721: -----G----- 780

9M6v3 (SMK) 721: -----G-----C-----A----- 780

9M6v4 (SMK) 721: -----G-----A----- 780

9M6v5 (SMK) 721: -----G-----C-----A----- 780

9M6v1 (SP) 781: AAGCATCGCGAAGAGTACAAAATTGTTGACCAGATTTTATTCATTTGTTGTTACAAGCT 840

9M6v2 (SP) 781: ----- 840

9M6v3 (SMK) 781: ----- 840

9M6v4 (SMK) 781: ----- 840

9M6v5 (SMK) 781: ----- 840

9M6v1 (SP) 841: CGTAAAAACGAACTAAAAGAAGAAACAGCTGATGACGAGTTGAAAAGTGCCGGATTTACC 900

9M6v2 (SP) 841: -----G----- 900

9M6v3 (SMK) 841: -----G-----A 900

9M6v4 (SMK) 841: -----G----- 900

9M6v5 (SMK) 841: -----G----- 900

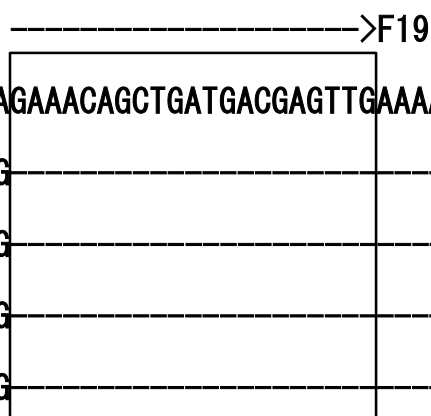

9M6v1 (SP) 901: ACTGTTGAGGAACACATAGAAGCTTCTACAGAGAACAGCCAATATACGGATTTGGACATC 960

9M6v2 (SP) 901: -----G-----G----- 960

9M6v3 (SMK) 901: -----A-----G-----T----- 960

9M6v4 (SMK) 901: -----G-----G----- 960

9M6v5 (SMK) 901: -----G-----G-----T-----T----- 960

*9M6v1*(SP) 961: ACAGCGGTCGCTGCCTCATTCTTCTTTGGAGGCATTGAAACGACTACCACGATGCTATGC 1020  
*9M6v2*(SP) 961: -----T-----A----- 1020  
*9M6v3*(SMK) 961: -----A----- 1020  
*9M6v4*(SMK) 961: -----T-----A----- 1020  
*9M6v5*(SMK) 961: -----A----- 1020

*9M6v1*(SP) 1021: TTCGCTCTATACGAGCTTGCAGGAAATAAAGAAGTTCAACAAAACTTCAAGCCGAAATT 1080  
*9M6v2*(SP) 1021: -----A--A-----G--A----- 1080  
*9M6v3*(SMK) 1021: ----- 1080  
*9M6v4*(SMK) 1021: -----A-----T----- 1080  
*9M6v5*(SMK) 1021: ----- 1080

*9M6v1*(SP) 1081: GATTCCGTCAGAAAAGAGCTGGGAGAAGGTAGTTTGACATACGAGGTGCTCCAAAAGATG 1140  
*9M6v2*(SP) 1081: ---A-G-G---C---A-----A---G-A--- 1140  
*9M6v3*(SMK) 1081: ---G---C-----G--- 1140  
*9M6v4*(SMK) 1081: ---G---C---C-----G--- 1140  
*9M6v5*(SMK) 1081: ---G-A---C-----G--- 1140

----->  
 ----->  
*9M6v1*(SP) 1141: AAGTACCTCGACATGGTCGTAACGGAAACCTTACGGCGATGGCCACCCCTGGGGATAACC 1200  
*9M6v2*(SP) 1141: --A--A-T----- 1200  
*9M6v3*(SMK) 1141: -----A-----A----- 1200  
*9M6v4*(SMK) 1141: ---T---T-----A----- 1200  
*9M6v5*(SMK) 1141: -----A-----A----- 1200

--->F95

--->F96

|                    |       |                                                              |      |
|--------------------|-------|--------------------------------------------------------------|------|
| <i>9M6v1</i> (SP)  | 1201: | AATCGAGTATGCGTCAAACCGTACACCTTCGAGGACCATGAAGGAACTAAAGTAACCATC | 1260 |
| <i>9M6v2</i> (SP)  | 1201: |                                                              | 1260 |
| <i>9M6v3</i> (SMK) | 1201: | C                                                            | 1260 |
| <i>9M6v4</i> (SMK) | 1201: | C                                                            | 1260 |
| <i>9M6v5</i> (SMK) | 1201: | C                                                            | 1260 |

<-----R97

|                    |       |                                                              |      |
|--------------------|-------|--------------------------------------------------------------|------|
| <i>9M6v1</i> (SP)  | 1261: | GAAAAGGGTCAACTCATCCAGATTCCAGTTCAGTCGTTCCATCGCGATCCCAACTTCTTC | 1320 |
| <i>9M6v2</i> (SP)  | 1261: |                                                              | 1320 |
| <i>9M6v3</i> (SMK) | 1261: |                                                              | 1320 |
| <i>9M6v4</i> (SMK) | 1261: |                                                              | 1320 |
| <i>9M6v5</i> (SMK) | 1261: |                                                              | 1320 |

<---

|                    |       |                                                             |      |
|--------------------|-------|-------------------------------------------------------------|------|
| <i>9M6v1</i> (SP)  | 1321: | CCCGATCCGTACCGTTTCGATCCGGAGCGGTTCTCCGAAGAGAACAACACAAAATCAAT | 1380 |
| <i>9M6v2</i> (SP)  | 1321: |                                                             | 1380 |
| <i>9M6v3</i> (SMK) | 1321: |                                                             | 1380 |
| <i>9M6v4</i> (SMK) | 1321: | A                                                           | 1380 |
| <i>9M6v5</i> (SMK) | 1321: |                                                             | 1380 |

<-----R64

|                    |       |                                                               |      |      |
|--------------------|-------|---------------------------------------------------------------|------|------|
| <i>9M6v1</i> (SP)  | 1381: | CAGGATGCCTTCTTGCCGTTTGGAAAGTGGACCTCGGAACTGTATCGGCTCGAGGCTGGCG | 1440 |      |
| <i>9M6v2</i> (SP)  | 1381: |                                                               | 1440 |      |
| <i>9M6v3</i> (SMK) | 1381: |                                                               | 1440 |      |
| <i>9M6v4</i> (SMK) | 1381: | C                                                             | T    | 1440 |
| <i>9M6v5</i> (SMK) | 1381: |                                                               | A    | 1440 |

|                    |                                                                       |      |
|--------------------|-----------------------------------------------------------------------|------|
| <i>9M6v1</i> (SP)  | 1441 : CTGATGCAAGCCAAATGTTTGCTGTACTATTTGTTTCAGTGCTTTTTTCGCTGGAGTATTCC | 1500 |
| <i>9M6v2</i> (SP)  | 1441 : -----                                                          | 1500 |
| <i>9M6v3</i> (SMK) | 1441 : -----                                                          | 1500 |
| <i>9M6v4</i> (SMK) | 1441 : -----                                                          | 1500 |
| <i>9M6v5</i> (SMK) | 1441 : -----                                                          | 1500 |
|                    |                                                                       |      |
| <i>9M6v1</i> (SP)  | 1501 : GACAAGATGGACGTGCCGATCAAGCTGAACAAGATGTCGCTGACGTATACGGCGAAGAAT   | 1560 |
| <i>9M6v2</i> (SP)  | 1501 : -----                                                          | 1560 |
| <i>9M6v3</i> (SMK) | 1501 : -----A-----                                                    | 1560 |
| <i>9M6v4</i> (SMK) | 1501 : -----                                                          | 1560 |
| <i>9M6v5</i> (SMK) | 1501 : -----A-----                                                    | 1560 |
|                    |                                                                       |      |
| <i>9M6v1</i> (SP)  | 1561 : GGATTTTGGTTCAATTTGCTGCCGAAAAAAGTGGCTGTGTAA                     | 1602 |
| <i>9M6v2</i> (SP)  | 1561 : -----AG-----G-----                                             | 1602 |
| <i>9M6v3</i> (SMK) | 1561 : -----AG-A-----G-----                                           | 1602 |
| <i>9M6v4</i> (SMK) | 1561 : -----G-----                                                    | 1602 |
| <i>9M6v5</i> (SMK) | 1561 : -----AG-A-----G-----                                           | 1602 |

**Figure S2** Multiple alignments of *CYP9M6* cDNA sequences identified from SP and SMK strains of *Aedes aegypti*. Hyphens indicate identical nucleotides to the sequence of *CYP9M6v1* (SP). *CYP9M6v1* and *v2* are identified from SP strain. *CYP9M6v3*, *v4*, and *v5* were identified from SMK strain. Primers used for genotyping were also indicated. For the deduced amino acid sequences, see Figure S4.
