# Supplementary material for: Mechanisms of Pyrethroid Resistance in the Dengue Mosquito Vector, Aedes aegypti: Target Site Insensitivity, Penetration, and Metabolism
Source: PubMed Central journal article supplement (PMC4063723; doi:10.1371/journal.pntd.0002948), 2014-06-19
Supplement: pntd.0002948.s003.pdf [file pntd.0002948.s003.pdf]

1 ATGGACCCAGTTACGGTGATTTTGACGATTTTCGTGGGCCTAACGGGGCTCGTCTACTTCTTTCTGAGGCGGGAGCAGCAGAAATGGCCA 90  
M D P V T V I L T I F V G L T G L V Y F F L R R E Q Q K W P

91 CGATTAGCGTTCGGTTCGCGAAGAATCCTCACCTACTATTCGGGAACGTTGAGGAATATTCAGAAAAGACACAGCTGCGAAATCCTC 180  
R L G V P F A K N P H L L F G N V R G I F Q K E H S C E I L

181 CAGCGATTGTAAGGGAGTTCAAGGGCCGAGGATTGAAGCTCGGTGGAATTATGAACTTCTCCAGCCGGCAGTGCTGGTTATCGATCCG 270  
Q R L Y W E F K G R G L K L G G I M N F F Q P A V L V I D P

271 GAGATCAGCAAGAGTATCCTGGTAAAAGATTCAACAAGTTTCATGATCGGGAATTTTCGTGGATCCGGCGGGGGATCCTCTGAGTGCC 360  
E I S K S I L V K D F N K F H D R G I F V D P A G D P L S A

361 AATCTGTTACGCTGGAGGGAGCCAGTGGGAAGCAATCGGTACGAAGATGTCTCCGACGTTCACTCGGGGAAGATGAAGTACATGTT 450  
N L F S L E G A Q W K A M R T K M S P T F T S G K M K Y M F

451 GAGTCGGTTCTGAACGTGGCCGAGCGGTTGAAGGACTATTTGGCGGAGAATTGCCTGAAGGAGGACATCGAGCTGAAGAACATTCTGCAG 540  
E S V L N V A E R L K D Y L A E N C L K E D I E L K N I L Q

541 CGGTTTACGATGGACGTGATTGGTAATGTGGCGTTCGGGGTTGAGTGTAACGATTAAGAACCCGAGTTCGGAGTTCGGGTTGATGGGC 630  
R F T M D V I G N V A F G V E C N S I K N P S S E F R L M G

631 TAAAAGCGAACCCGTTTGACGGGGTAAGGTTTTGAAAGTTCTTCATCGGAGGCGCCTACAAAACTTTGCGAAGAAGATCAAGCTGAAG 720  
L K A N R F D G V R F L K F F I G G A Y K N F A K K I K L K

721 GTCGTGGAGGACGAGTTCACAAGTTCTTCATGAGTTTGGTGCACAGTACGGTGCATTACAGGGAAGGAACAACGTGAAAAGAAACGAC 810  
V V E D D V H K F F M S L V H S T V H Y R E G N N V K R N D

811 TTTTGAATTTGCTGATGGAGATCAAGAACAAGGAAAGTTGAGCGATGAACCAATTCGGGCGGCGAGGGAATCACGATGAACGAGATA 900  
F L N L L M E I K N K G K F S D E P N S G G E G I T M N E I

901 GCCGCGCAGTGTTCATTTTCTCACGGCCGGTTTCGAGACTTCGTCCACCACAATCAACTTCTGTCTGTACGAGTTGGCTAACATCCG 990  
A A Q C F I F F T A G F E T S S T T I N F C L Y E L A N N P

991 GATATTCAGGATCGATTGCGGAATGAGATTGAAGATGTAGTCGCTAAGGACGGAGGAGAGTTGAAATACGATACTCTGCTAGGTATGAAC 1080  
D I Q D R L R N E I E D V V A K D G G E L K Y D T L L G M N

1081 TATCTGGATCGAGTTGTCAGTGAACCCCTACGGAAGTACTCGGCGGTGGACAACCTCTCCGCATCTCCAACCTCGCCGTACACTCCGGAC 1170  
Y L D R V V S E T L R K Y S A V D N L F R I S N S P Y T P D

1171 GGCTGCAACTTCACCATCCCTGCAGGAACCCCTGTTCCAAATTCACCTCGATGCACCACGATCCGGAGTACTTCCCTGACCCAGGT 1260  
G C N F T I P A G T L F Q I P I H S M H H D P E Y F P D P G

1261 CGTTTCGATCCGGATCGATTCTACCGGAAGTGGCCAAATCCCGACCCATACTGCTACCTGCCCTTCGGTGAAGGACCCCGGTTTGC 1350  
 R F D P D R F L P E V A K S R H P Y C Y L P F G E G P R V C

1351 ATCGGGATCGGATTCGGGTTGATGCAGACCAAGATCGGATTGGTTACGTTGCTGCGGAACTTCGGCTTCGGGCCCGGTCGAGACTCCG 1440  
 I G M R F G L M Q T K I G L V T L L R N F R F G P R S E T P

1441 GACCGATTGCAGTTTGAAGCGAAGACGTTTGTGCTGACGCCGACACCGGGATATACCTGAAGATTGAACCGATCGGGATATGAaggagt 1530  
 D R L Q F E A K T F V L T P Q T G I Y L K I E P I G I \*

1531 gaytgtgtagagtagcttgagagcgttggatctaaaaacccccaaaaataaagggttaggcttcagcatccatcacagataagctat 1620  
 6BB2R22 primer poly(A) addition signal 6BB2F21 primer

**Figure S3** Full length cDNA and deduced amino acid sequence of CYP6BB2 from SP and SMK strains of *Aedes aegypti*. The red letter indicates the only nucleotide differentiate between SP (cytosine) and SMK (thymidine) in this region. The 6BB2F21 and 6BB2R22 primers were used for genotyping. The poly(A) addition signal (aataaa) is also underlined.
