# Supplementary material for: Mechanisms of Pyrethroid Resistance in the Dengue Mosquito Vector, Aedes aegypti: Target Site Insensitivity, Penetration, and Metabolism
Source: PubMed Central journal article supplement (PMC4063723; doi:10.1371/journal.pntd.0002948), 2014-06-19
Supplement: pntd.0002948.s004.pdf [file pntd.0002948.s004.pdf]

|                 |      |                                                                   |     |
|-----------------|------|-------------------------------------------------------------------|-----|
| 9M6 (Liverpool) | 1:   | MVLLDLLVLIPIVSYLLYRWAVATYDFFEKRKIPYVKPYPFVGGGLWPFVSGKLHPTDAA      | 60  |
| 9M6v1 (SP)      | 1:   | -----                                                             | 60  |
| 9M6v2 (SP)      | 1:   | -----                                                             | 60  |
| 9M6v3 (SMK)     | 1:   | -----                                                             | 60  |
| 9M6v4 (SMK)     | 1:   | -----                                                             | 60  |
| 9M6v5 (SMK)     | 1:   | -----                                                             | 60  |
|                 |      |                                                                   |     |
| 9M6 (Liverpool) | 61:  | VLGYNLFPENRFSGFFAFRRPGYL I HDPALAKQIMIKDFDHFTHMNTISVDVDP I FGRA   | 120 |
| 9M6v1 (SP)      | 61:  | -----                                                             | 120 |
| 9M6v2 (SP)      | 61:  | -----                                                             | 120 |
| 9M6v3 (SMK)     | 61:  | -----T-----                                                       | 120 |
| 9M6v4 (SMK)     | 61:  | -----                                                             | 120 |
| 9M6v5 (SMK)     | 61:  | -----                                                             | 120 |
|                 |      |                                                                   |     |
| 9M6 (Liverpool) | 121: | LFFMDGQRWRHGRSGLSPAFTGSKMRNMFTLLSKYVEGAMQRLAQDAGQGKMELEIRDLF      | 180 |
| 9M6v1 (SP)      | 121: | -----R-----V-----                                                 | 180 |
| 9M6v2 (SP)      | 121: | -----                                                             | 180 |
| 9M6v3 (SMK)     | 121: | -----                                                             | 180 |
| 9M6v4 (SMK)     | 121: | -----                                                             | 180 |
| 9M6v5 (SMK)     | 121: | -----                                                             | 180 |
|                 |      |                                                                   |     |
| 9M6 (Liverpool) | 181: | QKLGNDIITSISFGVEIDSVHNPNEFFKRGKQLAATGGFQGLKFFFSLVVPDSVFKLFG       | 240 |
| 9M6v1 (SP)      | 181: | -----                                                             | 240 |
| 9M6v2 (SP)      | 181: | -----                                                             | 240 |
| 9M6v3 (SMK)     | 181: | -----                                                             | 240 |
| 9M6v4 (SMK)     | 181: | -----                                                             | 240 |
| 9M6v5 (SMK)     | 181: | -----                                                             | 240 |
|                 |      |                                                                   |     |
| 9M6 (Liverpool) | 241: | IRFLPKEADFYVDVVSKT I KHREEYK I VRPDF I HLFVQARKNELKEETADDELKSAGFT | 300 |
| 9M6v1 (SP)      | 241: | -----                                                             | 300 |
| 9M6v2 (SP)      | 241: | -----                                                             | 300 |
| 9M6v3 (SMK)     | 241: | -----                                                             | 300 |
| 9M6v4 (SMK)     | 241: | -----                                                             | 300 |
| 9M6v5 (SMK)     | 241: | -----                                                             | 300 |
|                 |      |                                                                   |     |
| 9M6 (Liverpool) | 301: | TVEEHIEASTENSQYTDLDITAVAASFFFGGIETTTMLCFALYELAGNKEVQQKLQAEI       | 360 |
| 9M6v1 (SP)      | 301: | -----                                                             | 360 |
| 9M6v2 (SP)      | 301: | -----E-----                                                       | 360 |
| 9M6v3 (SMK)     | 301: | -----                                                             | 360 |
| 9M6v4 (SMK)     | 301: | -----                                                             | 360 |
| 9M6v5 (SMK)     | 301: | -----                                                             | 360 |
|                 |      |                                                                   |     |
| 9M6 (Liverpool) | 361: | DSVRKELGGGSLTYEVLQKMKYLDMVVTETLRRWPPLGI TNRVCVKPYTFEDHEGTVKVI     | 420 |
| 9M6v1 (SP)      | 361: | -----E-----                                                       | 420 |
| 9M6v2 (SP)      | 361: | -----ED-----M-----                                                | 420 |
| 9M6v3 (SMK)     | 361: | -----E-----                                                       | 420 |
| 9M6v4 (SMK)     | 361: | -----                                                             | 420 |
| 9M6v5 (SMK)     | 361: | -----E-----                                                       | 420 |

|                 |                                                                  |     |
|-----------------|------------------------------------------------------------------|-----|
| 9M6 (Liverpool) | 421: EKGQLIQIPVQSFHRDPSFFPDYRFDPERFSEENKHKINQDAFLPFGSGPRNCIGSRLA | 480 |
| 9M6v1 (SP)      | 421: -----N-----                                                 | 480 |
| 9M6v2 (SP)      | 421: -----N-----                                                 | 480 |
| 9M6v3 (SMK)     | 421: -----N-----                                                 | 480 |
| 9M6v4 (SMK)     | 421: -----                                                       | 480 |
| 9M6v5 (SMK)     | 421: -----N-----*                                                | 473 |
|                 |                                                                  |     |
| 9M6 (Liverpool) | 481: LMQAKCLLYLFSAFSLEYSKMDVPIKLNKMSLTYTAKNGFWFNLLPKKVAV*        | 533 |
| 9M6v1 (SP)      | 481: -----*                                                      | 533 |
| 9M6v2 (SP)      | 481: -----V-R-----*                                              | 533 |
| 9M6v3 (SMK)     | 481: -----V-R-----*                                              | 533 |
| 9M6v4 (SMK)     | 481: -----*                                                      | 533 |
| 9M6v5 (SMK)     | 473: -----                                                       | 473 |

**Figure S4** Multiple alignments of CYP9M6 amino acid sequences identified from Liverpool, SP, and SMK strains of *Aedes aegypti*. Hyphens indicate identical amino acids to the sequence of Liverpool strain which was used for the genome project. Asterisks indicate stop codons.
