# Supplementary material for: Mechanisms of Pyrethroid Resistance in the Dengue Mosquito Vector, Aedes aegypti: Target Site Insensitivity, Penetration, and Metabolism
Source: PubMed Central journal article supplement (PMC4063723; doi:10.1371/journal.pntd.0002948), 2014-06-19
Supplement: pntd.0002948.s006.pdf [file pntd.0002948.s006.pdf]

**Table S2** *In vitro* metabolism of [<sup>14</sup>C]-permethrin by microsome of SP and SMK strains of *Aedes aegypti*.

| Metabolites            | Incubation time (min) |             |             |             |             |             |             |             |  |
|------------------------|-----------------------|-------------|-------------|-------------|-------------|-------------|-------------|-------------|--|
|                        | SP strain             |             |             |             |             | SMK strain  |             |             |  |
|                        | 5                     | 30          | 60          | 120         | 360         | 5           | 30          | 60          |  |
| Permethrin             | 85.0 (0.87)           | 63.5 (3.80) | 54.5 (5.29) | 47.2 (7.50) | 37.7 (8.32) | 95.1 (0.21) | 91.4 (0.46) | 89.0 (0.66) |  |
| 4'HO-permethrin        | 5.9 (0.44)            | 9.9 (1.03)  | 9.7 (1.00)  | 8.1 (0.64)  | 6.7 (0.80)  | 1.4 (0.04)  | 3.5 (0.26)  | 4.6 (0.30)  |  |
| Origin (high polar)    | 6.4 (0.38)            | 22.9 (2.44) | 32.4 (3.99) | 41.9 (6.76) | 53.4 (7.48) | 1.7 (0.06)  | 3.1 (0.11)  | 4.4 (0.26)  |  |
| Other metabolites      | 2.7 (0.08)            | 3.7 (0.33)  | 3.4 (0.43)  | 2.7 (0.09)  | 2.1 (0.22)  | 1.8 (0.15)  | 2.0 (0.10)  | 2.0 (0.11)  |  |
| % of Total metabolites | 15.0                  | 36.5        | 45.5        | 52.8        | 62.3        | 4.9         | 8.6         | 11.0        |  |

Results are expressed as a percentage of the recovered dose.

All values are the mean of three replicates ( $\pm$ SE in parentheses).
