# Supplementary material for: Mechanisms of Pyrethroid Resistance in the Dengue Mosquito Vector, Aedes aegypti: Target Site Insensitivity, Penetration, and Metabolism
Source: PubMed Central journal article supplement (PMC4063723; doi:10.1371/journal.pntd.0002948), 2014-06-19
Supplement: pntd.0002948.s007.pdf [file pntd.0002948.s007.pdf]

**Table S3** Metabolism of [<sup>14</sup>C]-permethrin by CYP9M6v1, CYP9M6v2, and CYP6BB2 expressed in Sf9 cells.

| Metabolite             | Control      | CYP9M6v1    | CYP9M6v2    | CYP6BB2     |
|------------------------|--------------|-------------|-------------|-------------|
| A                      | 0.44 ± 0.15  | 2.7 ± 0.59  | 1.6 ± 0.69  | 0.53 ± 0.16 |
| B                      | 1.2 ± 0.19   | 5.3 ± 0.90  | 3.6 ± 0.40  | 1.2 ± 0.12  |
| 4'HO-permethrin        | 0.76 ± 0.36  | 5.5 ± 0.40  | 3.0 ± 0.17  | 15 ± 0.39   |
| C                      | 0.083 ± 0.24 | 1.6 ± 0.35  | 0.95 ± 0.22 | 2.7 ± 0.23  |
| D                      | 5.1 ± 0.55   | 4.2 ± 0.07  | 3.1 ± 0.15  | 4.7 ± 0.23  |
| E (polar)              | 1.3 ± 0.89   | 9.0 ± 0.20  | 3.2 ± 0.30  | 25 ± 0.57   |
| % of total metabolites | 8.9 ± 2.1    | 28.4 ± 0.11 | 15.5 ± 0.69 | 48.8 ± 1.1  |

Results are expressed as a percentage of the recovered dose.

All values are mean±SE of three replicates.
