# Supplementary material for: Mechanisms of Pyrethroid Resistance in the Dengue Mosquito Vector, Aedes aegypti: Target Site Insensitivity, Penetration, and Metabolism
Source: PLoS Negl Trop Dis. 2014 Jun 19;8(6):e2948. doi: 10.1371/journal.pntd.0002948 (PMC4063723; doi:10.1371/journal.pntd.0002948)
Supplement: Table S1 — Primer lists. (XLSX) [file pntd.0002948.s005.xlsx]

## Sheet: Table S1
Table S1 Primer lists.
Gene	Primer name	Sequence	Purpose
CYP6BB2	6BB2F1	GGCTTCATCCTAGAAGGATC	PCR amplification, sequencing
	6BB2R2	CTCTACACAGTCACTCCTTC	PCR amplification, sequencing
	6BB2F3	AGAAAGAGCACAGCTGCGAAA	real time PCR
	6BB2R4	ACTGCCGGCTGGAAGAAGTT	real time PCR
	6BB2R5	CATTCCGCAATCGATCCTGA	sequencing primer
	6BB2F14	CAGTTTGAAGCGAAGACGTTTG	sequencing primer (association analysis)
	6BB2F15	TTACGTTGCTGCGGAACTTC	PCR amplification (association analysis)
	6BB2R17	GCAATTCACTGGAAGTCCTC	PCR amplification (association analysis)
	6BB2F19	GCTCTAGAATGGACCCAGTTACGGTG	Cloning to pPSC8 (with XbaI site)
	6BB2R20	GGGGTACCCTAGTGGTGATGGTGATGATGTATCCCGATCGGTTCAATCTTC	Cloning to pPSC8 (with 6xHis, stop codon and KpnI site)
	6BB2F21	GATCGGGATATGAAGGAGTG	genotyping
	6BB2R22	CTCTGCAAGCTACTCTACAC	genotyping
CYP6Z7	6Z7F1	TTGGCAGTGGGTGATAAGCT	PCR amplification, sequencing
	6Z7R2	CTGCAACCTTATCTCTTCTGG	PCR amplification, sequencing
	6Z7R4	GAGCTCATGCATTGTGAAGG	sequencing primer
	6Z7F5	CCAGGACTGCTGAAGTATACAGGAA	real time PCR
	6Z7R6	AATGAAATCCTTACGCGTCACA	real time PCR
CYP6Z8	6Z8F1	GTTTGTGGTCTTCACTCTTCG	PCR amplification, sequencing
	6Z8R2	CCTCGATGCCAATGAAGTCC	PCR amplification, sequencing
	6Z8F5	GCGAATTGGTGTCACGATGT	sequencing primer
	6Z8F8	CGCGAATTGGTGTCACGATG	real time PCR
	6Z8R9	TGAACGCATCGTTCGGATCATTAA	real time PCR
CYP9M4	9M4F1	TGTTCGAGTCGCTTGCTTTG	PCR amplification, sequencing
	9M4R2	TCTTCAGCTTGATCGGAACG	PCR amplification, sequencing
	9M4F5	CCGTACACGTTGGAAGATTATGAC	real time PCR
	9M4R6	TTGGGATCTGGACAGCTTGTC	real time PCR
CYP9M5	9M5F1	GCGATACAAGTGTGAATAGTAGGC	PCR amplification, sequencing
	9M5R2	CGTTTCAGGTCTTCACATCTC	PCR amplification, sequencing
	9M5F6	GGAATCGTCAGCAGAAAGTGTGT	real time PCR
	9M5R7	CGACTGCAGTGGAATTTGAATG	real time PCR
CYP9M6	9M6F1	GCTCTCATCGTTTCGTTTCTC	PCR amplification, sequencing
	9M6R3	CAAACTATCACTTTACACAGCCAC	PCR amplification, sequencing
	9M6R7	GCACCGAATCGATTTCTACG	sequencing primer
	9M6F8	CGTCAAACCGTACACCTTC	sequencing primer
	9M6R9	CGGGAATCTGGATGAGTTG	sequencing primer
	9M6F19	GAAACAGCTGATGACGAGTTG	sequencing (association analysis)
	9M6F18	GATGCTCCAGAAAATGAAATACCTAG	PCR amplification (specific to CYP9M6v2)
	9M6R21	GTACTTCATCTTTTGGAGCACC	PCR amplification (specific to CYP9M6v1
	9M6R22	CTAGGTATTTCATTTTCTGGAGCATC	PCR amplification (specific to CYP9M6v2)
	9M6F23	CTCCAAAAGATGAAGTACCTCG	PCR amplification (specific to CYP9M6v1
	9M6F30	GTGTTCATGGAAAGTGCTTGGTG	PCR amplification (specific to CYP9M6v2)
	9M6F31	CCGATGAATCAGTATCCATCGAG	PCR amplification (specific to 9M6v1)
	9M6R35	CACACCACGTTTGTCATAGATTGG	PCR amplification
	9M6F62	TCGATTTCGTTTGGCGTAGAA	PCR amplification (association analysis)
	9M6R64	GCAAGAAGGCATCCTGATTG	PCR amplification (association analysis)
	9M6F85	GCTCTAGAATGGTTTTGTTGGACTTGCTTGTTGTTC	Cloning to pPSC8 (with XbaI site)
	9M6R86	AAAACTGCAGCTAGTGGTGATGGTGATGATGCACAGCCACTTTTTTCGGCAGC	Cloning to pPSC8 (with 6xHis, stop codon and PstI site, for CYP9M6v1)
	9M6F87	AAAACTGCAGCTAGTGGTGATGGTGATGATGCACAGCCACTCTTTTCGGCACT	Cloning to pPSC8 (with 6xHis, stop codon and PstI site, for CYP9M6v2)
	9M6F88	TCGGTGCACAATCCAAACAAC	real time PCR, genotyping
	9M6R89	GTCGGGTACGACCAACGAAA	real time PCR, genotyping
	9M6F95	CCCTGGGGATAACCAATC	Genotyping (specific to SP)
	9M6F96	CCCTGGGAATAACCAACC	Genotyping (specific to SMK)
	9M6R97	GGAATCTGGATGAGTTGACC	Genotyping (common)
CYP9M7	9M7F1	CAAATAGTGCCAGTTCACTTCG	PCR amplification
	9M7R2	GTCTTGAGTTTGATCGGTAGGT	PCR amplification
	9M7F3	GGATTGCTTTGGTGCTTCTCA	sequencing primer
	9M7R4	CAGTATGCATTTGGCTTGCATC	sequencing primer
	9M7F5	CACGTTGGCAAAGCAGATAATGG	real time PCR
	9M7R6	AACAAAGCCCGCCCTAGAATC	real time PCR
RPS3	aegRPF1	GTTCGTTGCCAATGGCATGT	PCR amplification
	aegRPR2	AGAGTTTAGCTAGCCACTGG	PCR amplification
	aegRPF3	TACAAGCTGATCGGAGGTCT	sequencing primer
	aegRPR4	ACGTACTCGTTGCACGGATCT	sequencing primer
	aegRPF7	AGCGTGCCAAGTCGATGAA	real time PCR
	aegRPR8	GTGGCCGTGTCGACGTACT	real time PCR
Cytochrome P450 reductase	aegREDR5	GCTCTAGACTAGTGGTGATGGTGATGATGACTCCACACGTCGGCCGA	PCR amplification (cloning to pFastBac 1)
	aegREDR8	AGTGGGTGCTTCTGTGATAG	sequencing primer
	aegREDF9	GAAGGCCTATGGACGCACAGACGGAACC	PCR amplification (cloning to pFastBac 1)
	aegREDF10	GGAGGAGCTACTTTCACTGA	sequencing primer
Cytochrome b5	aegb5F1	CGGAATTCATGTCGGAAGTGAAAACCTTCTC	PCR amplification (cloning to pFastBac 1)
	aegb5R2	GCTCTAGACTAGTGGTGATGGTGATGATGGGAGTTCTCGTCCTTCTG	PCR amplification (cloning to pFastBac 1)
Vssc	AaSCF20	GACAATGTGGATCGCTTCCC	PCR amplification (for domain II)
	AaSCR21	GCAATCTGGCTTGTTAACTTG	PCR amplification (for domain II)
	AaSCF7	GAGAACTCGCCGATGAACTT	PCR amplification (for domain III)
	AaSCR7	GACGACGAAATCGAACAGGT	PCR amplification (for domain III)
	AlSCF6	TCGAGAAGTACTTCGTGTCG	PCR amplification (for domain IV)
	AlSCR8	AACAGCAGGATCATGCTCTG	PCR amplification (for domain IV)
	AaSCF3	GTGGAACTTCACCGACTTCA	sequencing for domain II
	AaSCR22	TTCACGAACTTGAGCGCGTTG	sequencing for domain II
	AaSCR8	TAGCTTTCAGCGGCTTCTTC	sequencing primer for domain III
	AlSCF7	AGGTATCCGAACGTTGCTGT	sequencing primer for domain IV
Other	QT'	CCAGTGAGCAGAGTGACGAGGACTCGTGCTCAAGCT15	Reverse transcription reaction
